# Supplementary material
Source: PubMed Central journal article supplement (PMC5821199)
Supplement: jciinsight-3-96029-s001.pdf [file jciinsight-3-96029-s001.pdf]

## Supplemental data

### Supplemental Figure and Figure Legends

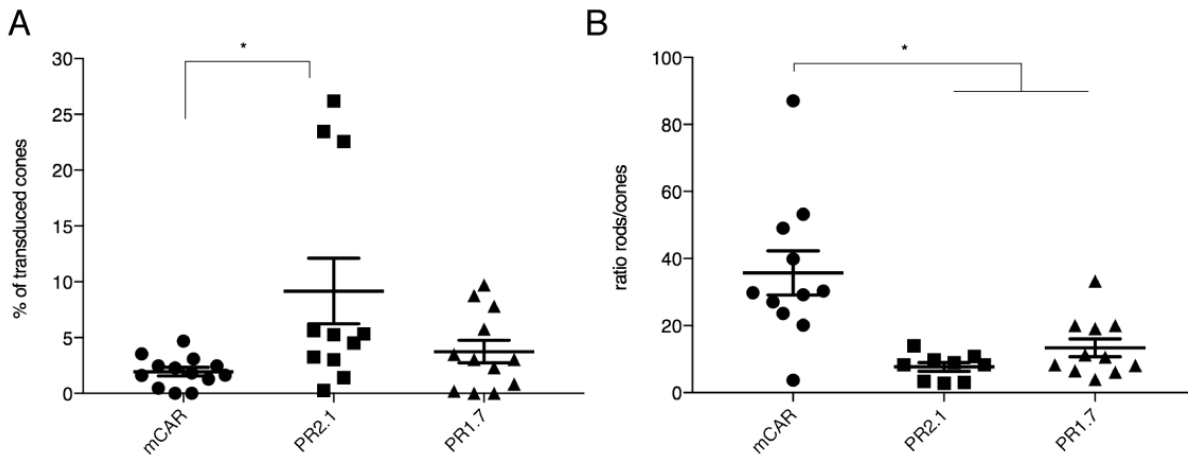

**Supplemental Figure 1: Quantification of cone transduction efficiency after intravitreal administration of AAV2-7m8-GFP in mice using mCAR, PR1.7 or PR2.1 promoters (n=4 eyes per condition).** (A) Quantification of the percentage of transduced cones based on flatmount images and colocalization of GFP and cone arrestin stainings. (B) Evaluation of the specificity of the promoters in the photoreceptor layer expressed as the ratio of number of transduced rods over the number of transduced cones. Data represent mean  $\pm$  SEM and were analyzed with ANOVA multiple comparison test. AAV: adeno-associated virus; mCAR: mouse cone arrestin promoter; PR1.7 and PR2.1: promoters of 1.7 and 2.1 kilobases in length, respectively, based on the human red opsin gene enhancer and promoter sequences.

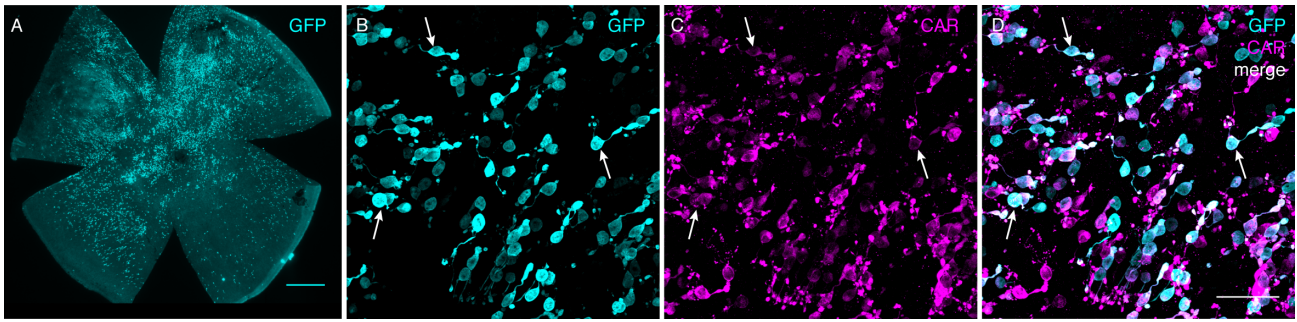

**Supplemental Figure 2: Cone transduction after intravitreal administration of AAV2-7m8-GFP in rd10 mice using PR1.7 promoter. (n=4 eyes)** (A) GFP expression in a 3-months old rd10 retinal whole-mount two months after injection. The retina is mounted with photoreceptor layer facing upwards. Scale bar is 500  $\mu\text{m}$ . (B-D) Zoom into the whole-mount retina shown in D. Scale bar is 40  $\mu\text{m}$ . (B) Cone cell bodies remaining after degeneration expressing GFP (cyan). (C) Cone arrestin immunostaining is shown in magenta. (D) Colocalization of GFP and cone arrestin stainings. AAV: adeno-associated virus; PR1.7: Promoter 1.7kilobases in length, based on the human red opsin gene enhancer and promoter sequences; rd10: retinal degeneration 10 mouse model for retinitis pigmentosa.

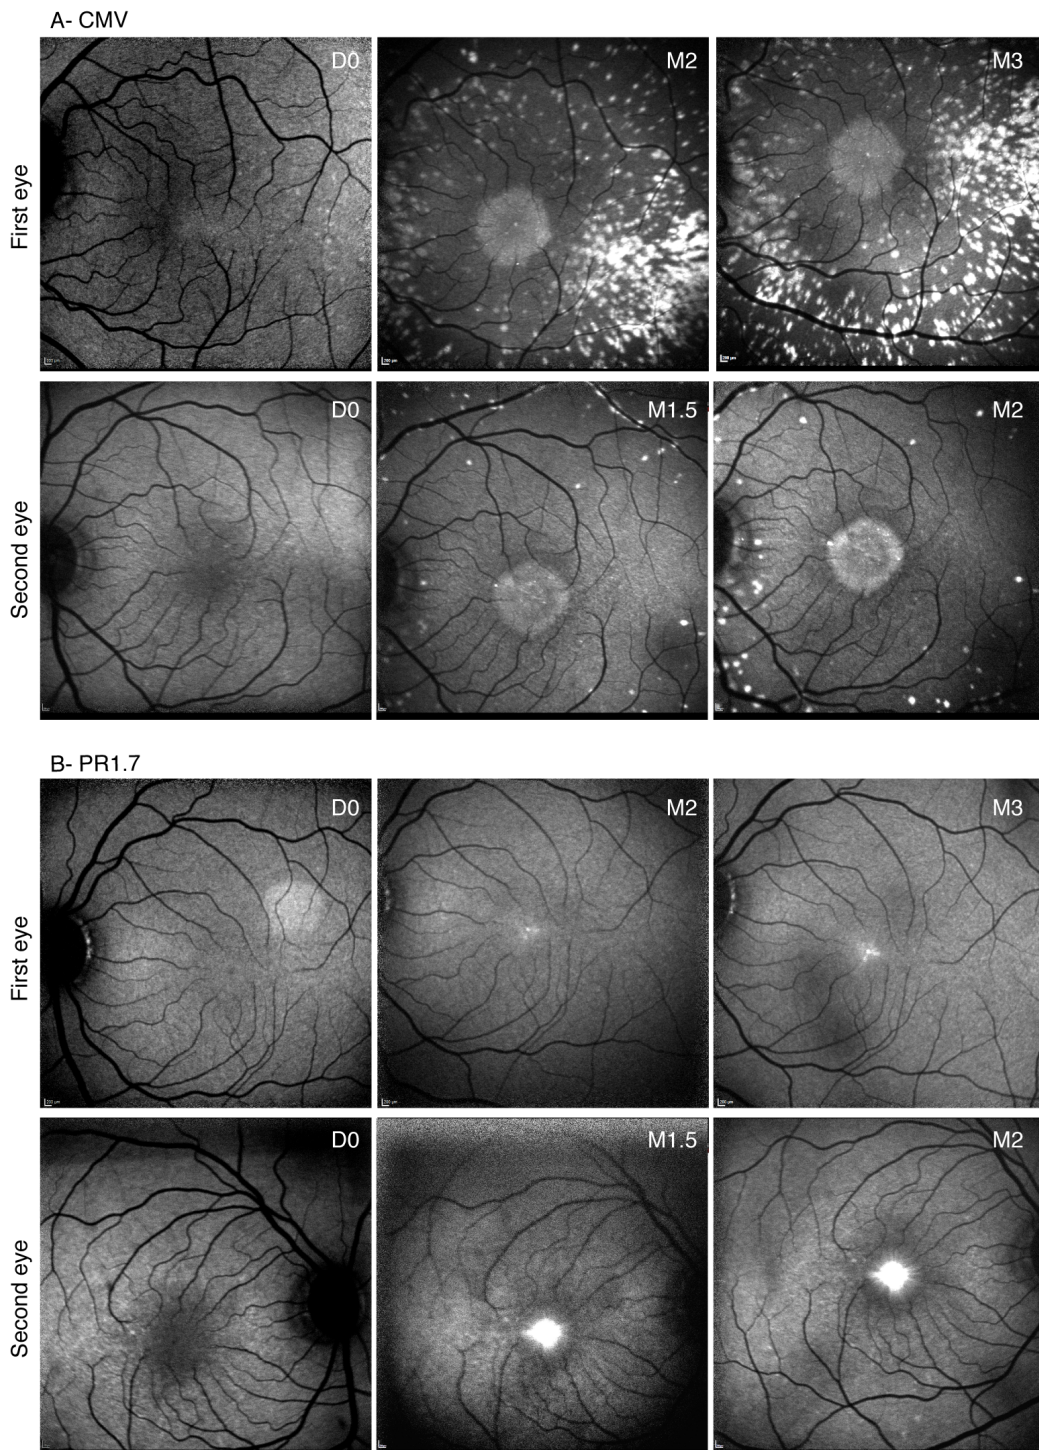

**Supplemental Figure 3: GFP expression follow-up after intravitreal administration of AAV2-7m8 under the control of CMV and PR1.7 promoters (n=2 per condition). (A)** Eye fundus images of CMV treated eyes. **(B)** Eye fundus images of PR1.7 treated eyes. D0: Day of injection, pre-dose; M1.5, 2, 3: Month 1.5, 2, 3 after injection. AAV: adeno-associated virus; CMV: cytomegalovirus promoter; PR1.7: Promoter 1.7kilobases in length, based on the human red opsin gene enhancer and promoter sequences.

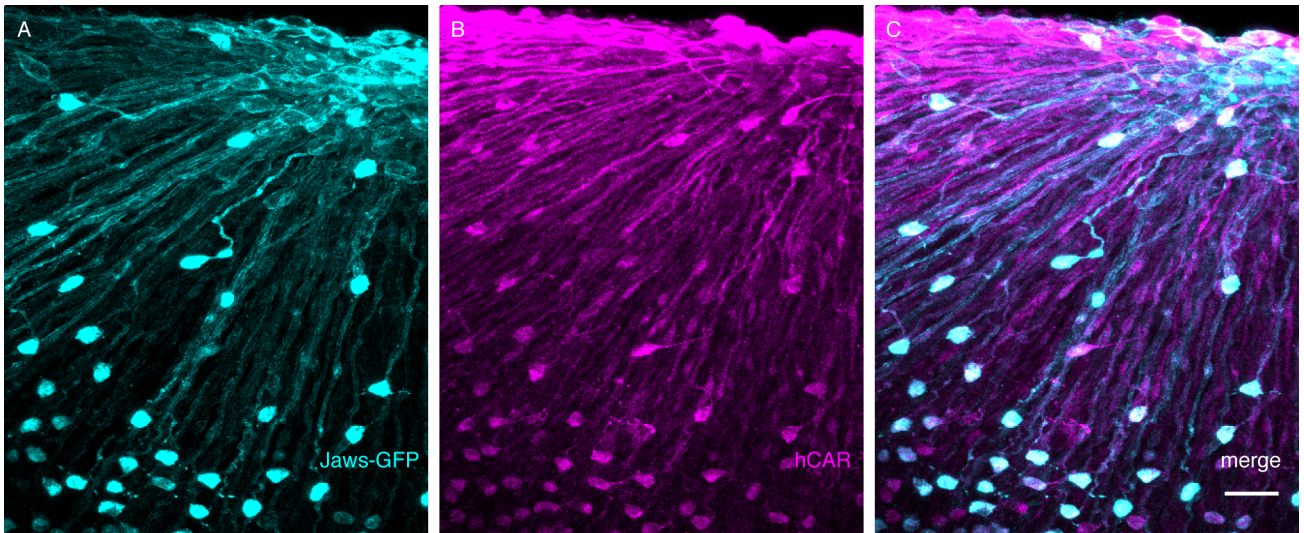

**Supplemental Figure 4: Cone transduction in the fovea after intravitreal administration of  $1 \times 10^{11}$  vg of AAV2-7m8-PR1.7-Jaws-GFP in one macaque eye (A) Jaws-GFP expression in foveal whole-mount two months after injection (cyan). (B) Human cone arrestin immunostaining is shown in magenta. (C) Colocalization of GFP and cone arrestin stainings. Scale bar is 20  $\mu$ m. AAV: adeno-associated virus; hCAR: human cone arrestin; PR1.7: Promoter 1.7kilobases in length, based on the human red opsin gene enhancer and promoter sequences.**

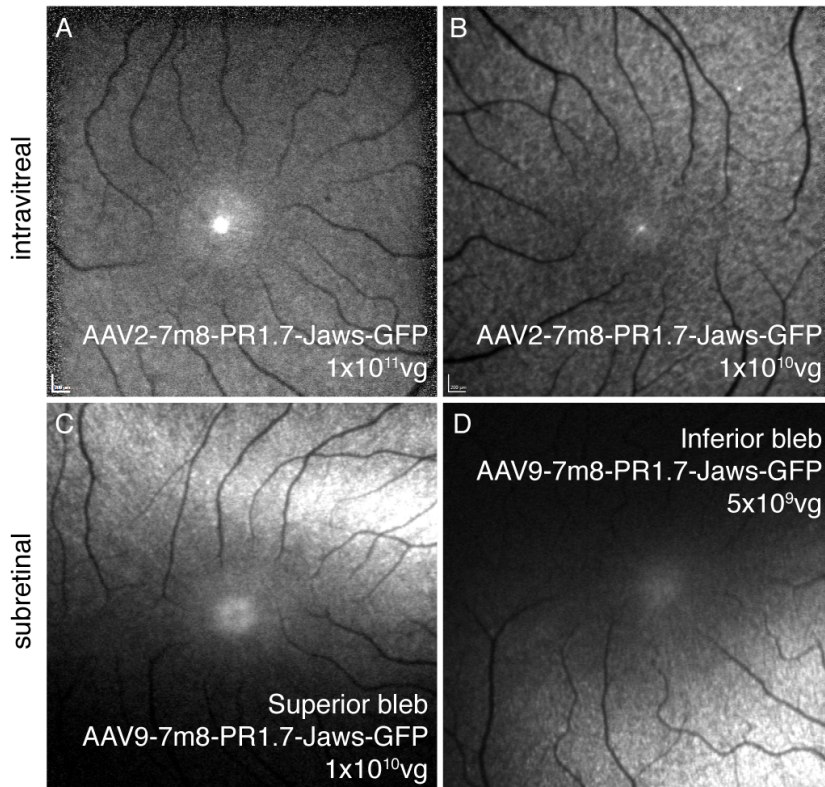

**Supplemental Figure 5: Macaque eye fundus images for characterization of dose response.** Jaws-GFP expression two months after intravitreal injection of  $10^{11}$  particles (n=1 eye) (**A**) and  $10^{10}$  particles (**B**) of AAV2-7m8-PR1.7-Jaws-GFP (n=1 eye). Jaws-GFP expression two weeks after subretinal injection of  $1 \times 10^{10}$  particles (n=1 eye, superior bleb) (**C**) and  $5 \times 10^9$  particles (n=2 eyes, inferior blebs) (**D**) of AAV9-7m8-PR1.7-Jaws-GFP. AAV: adeno-associated virus, vg: viral genome; PR1.7: Promoter 1.7kilobases in length, based on the human red opsin gene enhancer and promoter sequences.

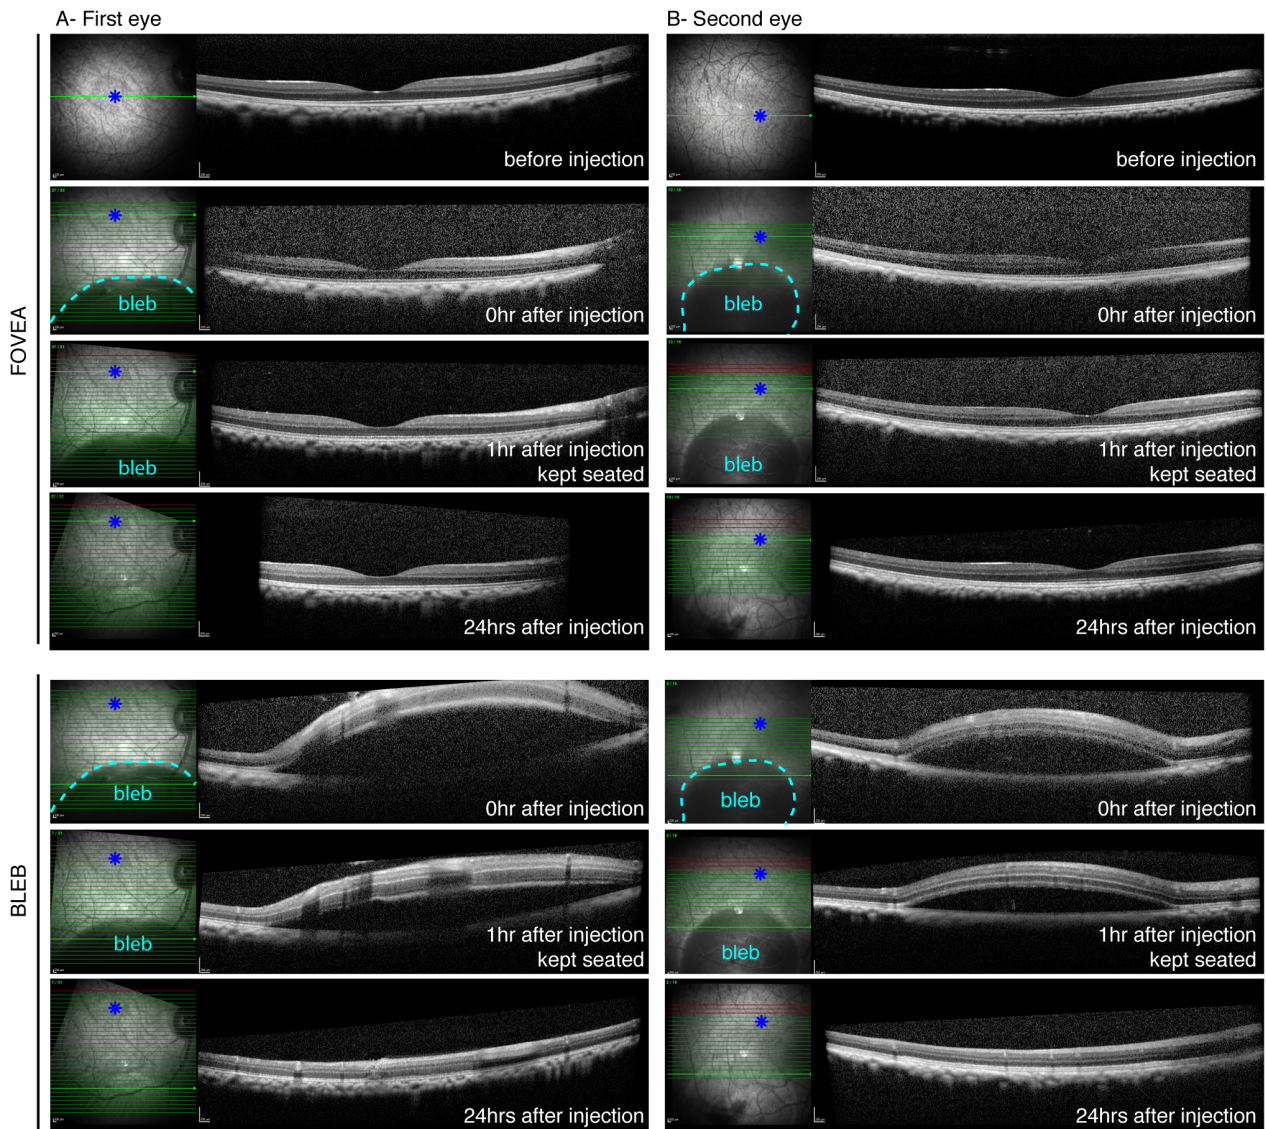

**Supplemental Figure 6: Distal inferior subretinal administration follow-up using in vivo eye fundus and optical coherence tomography (OCT) imaging.** Images were acquired before and after peripheral injection of AAV9-7m8-PR1.7-Jaws-GFP,  $5 \times 10^9$  viral particles ( $n=2$  eyes). Eye fundus infrared image is centered on the macula and OCT image was taken at the level of the fovea or at the level of the bleb shortly before and after the injections. Follow-up images were acquired one hour after injections while the animal was kept seated. Another image was acquired 24 hours after injections. Bleb: subretinally injected fluid; hrs: hours; AAV: adeno-associated virus, PR1.7: Promoter 1.7kilobases in length, based on the human red opsin gene enhancer and promoter sequences. Dark blue asterisk: fovea; bold green arrows: OCT image of the retina highlighted with the dark green arrow, is shown on the right part of each image; dashed cyan line: delimitation of the bleb.

## Supplemental Tables

### **Supplemental Table 1: Transcription factors' binding sites analysis for red opsin gene based promoters, PR2.1 and PR1.7.**

| Gene identification number | Gene title                                            | Protein symbol | OPN1LW Promoter fragment |         |        | Probe set             | Signal Intensity                 |                    |
|----------------------------|-------------------------------------------------------|----------------|--------------------------|---------|--------|-----------------------|----------------------------------|--------------------|
|                            |                                                       |                | Site number              |         |        | Identification number | Robust Multi-array Average (RMA) |                    |
|                            |                                                       |                | 2061 bp                  | 1724 bp | 337 bp |                       | Mean                             | Standard deviation |
| 196                        | Aryl hydrocarbon receptor                             | AHR            | 1                        | 1       | 0      | 202820_at             | 48.4                             | 1.8                |
| 467                        | Activating transcription factor 3                     | ATF3           | 2                        | 2       | 0      | 202672_s_at           | 51.6                             | 14.4               |
| 1051                       | CCAAT/enhancer binding protein beta                   | CEBPB          | 55                       | 41      | 14     | 212501_at             | 206.3                            | 35.5               |
| 1406                       | Cone-rod homeobox                                     | CRX            | 12                       | 11      | 1      | 217510_at             | 1638.3                           | 96.4               |
| 2002                       | ELK1. ETS transcription factor                        | ELK1           | 11                       | 9       | 2      | 203617_x_at           | 86.8                             | 2.6                |
| 2353                       | Fos proto-oncogene. AP-1 transcription factor subunit | FOS            | 9                        | 8       | 1      | 209189_at             | 744.1                            | 174.7              |
| 2969                       | General transcription factor Iii                      | GTF2I          | 54                       | 44      | 10     | 210892_s_at           | 41.6                             | 4.8                |
| 3091                       | Hypoxia inducible factor 1 alpha subunit              | HIF1A          | 1                        | 1       | 0      | 200989_at             | 810.1                            | 29.1               |
| 3725                       | Jun proto-oncogene. AP-1 transcription factor subunit | JUN            | 27                       | 23      | 4      | 201464_x_at           | 377.4                            | 50.9               |
| 4150                       | MYC associated zinc finger protein                    | MAZ            | 3                        | 3       | 0      | 212064_x_at           | 157.3                            | 6.9                |
| 4205                       | Myocyte enhancer factor 2A                            | MEF2A          | 1                        | 1       | 0      | 212535_at             | 203.8                            | 3.5                |
| 4782                       | Nuclear factor I C                                    | NFIC           | 36                       | 38      | 8      | 226895_at             | 195.6                            | 11.3               |
| 4800                       | Nuclear transcription factor Y subunit alpha          | NFYA           | 4                        | 3       | 1      | 228433_at             | 43.3                             | 1.7                |
| 10062                      | Nuclear receptor subfamily 1 group H member 3         | NR1H3          | 12                       | 11      | 1      | 217370_x_at           | 174.6                            | 17.2               |
| 7025                       | Nuclear receptor subfamily 2                          | NR2F1 /        | 1                        | 0       | 1      | 209505_at             | 128.6                            | 10.2               |

|      |                                                                              |          |     |     |    |             |       |      |
|------|------------------------------------------------------------------------------|----------|-----|-----|----|-------------|-------|------|
|      | group F member 1                                                             | COUP-TF1 |     |     |    |             |       |      |
| 2908 | Nuclear receptor subfamily 3<br>group C member 1                             | NR3C1    | 173 | 140 | 33 | 201865_x_at | 164.7 | 8.6  |
| 5451 | POU class 2 homeobox 1                                                       | POU2F1   | 3   | 2   | 1  | 227254_at   | 192.6 | 7.2  |
| 5465 | Peroxisome proliferator<br>activated receptor alpha                          | PPARA    | 6   | 5   | 1  | 223437_at   | 232.0 | 19.6 |
| 5914 | Retinoic acid receptor alpha                                                 | RARA     | 3   | 3   | 0  | 216300_x_at | 40.0  | 1.9  |
| 5915 | Retinoic acid receptor beta                                                  | RARB     | 6   | 6   | 0  | 205080_at   | 64.4  | 3.0  |
| 3516 | Recombination signal binding<br>protein for immunoglobulin<br>kappa J region | RBPJ     | 2   | 2   | 0  | 211974_x_at | 435.6 | 29.7 |
| 5970 | RELA proto-oncogene. NF-kB<br>subunit                                        | RELA     | 3   | 3   | 0  | 201783_s_at | 53.3  | 3.7  |
| 6256 | Retinoid X receptor alpha                                                    | RXRA     | 26  | 22  | 4  | 202449_s_at | 146.0 | 6.8  |
| 6667 | Sp1 transcription factor                                                     | SP1      | 2   | 1   | 1  | 224754_at   | 158.2 | 6.6  |
| 6772 | Signal transducer and activator<br>of transcription 1                        | STAT1    | 4   | 4   | 0  | 200887_s_at | 160.0 | 13.7 |
| 6908 | TATA-box binding protein                                                     | TBP      | 14  | 11  | 3  | 203135_at   | 76.7  | 2.7  |
| 6925 | Transcription factor 4                                                       | TCF4     | 2   | 2   | 0  | 212386_at   | 526.0 | 30.8 |
| 6934 | Transcription factor 7 like 2                                                | TCF7L2   | 6   | 5   | 1  | 212761_at   | 140.6 | 8.4  |
| 8463 | TEA domain transcription<br>factor 2                                         | TEAD2    | 8   | 5   | 3  | 243766_s_at | 53.4  | 2.4  |
| 7020 | Transcription factor AP-2 alpha                                              | TFAP2A   | 28  | 23  | 5  | 204653_at   | 264.8 | 29.5 |
| 7068 | Thyroid hormone receptor beta                                                | THRB     | 10  | 9   | 1  | 229657_at   | 106.4 | 5.3  |
| 7392 | Upstream transcription factor 2                                              | USF2     | 5   | 5   | 0  | 202152_x_at | 176.8 | 9.4  |
| 7528 | YY1 transcription factor                                                     | YY1      | 18  | 15  | 3  | 201901_s_at | 379.0 | 22.4 |

PR1.7 and PR2.1: promoters of 1.7 and 2.1 kilobases in length, respectively, based on the human red opsin gene enhancer and promoter sequences; bp: base pairs.



**Supplemental Table 2: Transcription factors' binding sites analysis for mouse cone arrestin (mCAR) promoter.**

| Gene identification number | Gene title                                             | Protein symbol | Mouse <i>Arr3</i> Promotor fragment |                      | Probe set   | Signal Intensity      |                                  |                    |
|----------------------------|--------------------------------------------------------|----------------|-------------------------------------|----------------------|-------------|-----------------------|----------------------------------|--------------------|
|                            |                                                        |                | Site number                         |                      |             | Identification number | Robust Multi-array Average (RMA) |                    |
|                            |                                                        |                | 3207 bp<br>(-3170/+37)              | 521 bp<br>(-510/+11) |             |                       | Mean                             | Standard deviation |
| 8546                       | Adaptor-related protein complex 3, beta 1 subunit      | AP3B1          | 5                                   | 0                    | 203142_s_at | 55.3                  | 2.1                              |                    |
| 1386                       | Activating transcription factor 2                      | ATF2           | 1                                   | 0                    | 212984_at   | 150.2                 | 5.2                              |                    |
| 467                        | Activating transcription factor 3                      | ATF3           | 5                                   | 0                    | 202672_s_at | 51.6                  | 14.4                             |                    |
| 79365                      | Basic helix-loop-helix family member e41               | BHLHE41        | 5                                   | 0                    | 221530_s_at | 1083.9                | 64.2                             |                    |
| 1051                       | CCAAT/enhancer binding protein beta                    | CEBPB          | 221                                 | 37                   | 212501_at   | 206.3                 | 35.5                             |                    |
| 1406                       | Cone-rod homeobox                                      | CRX            | 19                                  | 6                    | 217510_at   | 1638.3                | 96.4                             |                    |
| 1998                       | E74 like ETS transcription factor 2                    | ELF2           | 2                                   | 0                    | 203822_s_at | 91.9                  | 2.8                              |                    |
| 2002                       | ELK1. ETS transcription factor                         | ELK1           | 10                                  | 2                    | 203617_x_at | 86.8                  | 2.6                              |                    |
| 2353                       | Fos proto-oncogene. AP-1 transcription factor subunit  | FOS            | 146                                 | 25                   | 209189_at   | 744.1                 | 174.7                            |                    |
| 2969                       | General transcription factor Iii                       | GTF2I          | 3                                   | 0                    | 210892_s_at | 41.6                  | 4.8                              |                    |
| 3280                       | Hes family bHLH transcription factor 1                 | HES1           | 26                                  | 0                    | 203394_s_at | 522                   | 71.3                             |                    |
| 3725                       | Jun proto-oncogene. AP-1 transcription factor subunit  | JUN            | 85                                  | 8                    | 201464_x_at | 377.4                 | 50.9                             |                    |
| 3726                       | JunB proto-oncogene. AP-1 transcription factor subunit | JUNB           | 2                                   | 0                    | 201473_at   | 369.1                 | 77.6                             |                    |
| 3727                       | JunD proto-oncogene. AP-1 transcription factor subunit | JUND           | 20                                  | 2                    | 203752_s_at | 580.8                 | 63.8                             |                    |

|       |                                                                        |                  |     |    |             |        |      |
|-------|------------------------------------------------------------------------|------------------|-----|----|-------------|--------|------|
| 4150  | MYC associated zinc finger protein                                     | MAZ              | 14  | 3  | 212064_x_at | 157.3  | 6.9  |
| 4205  | Myocyte enhancer factor 2A                                             | MEF2A            | 4   | 0  | 212535_at   | 203.8  | 3.5  |
| 4520  | Metal regulatory transcription factor 1                                | MTF1             | 2   | 1  | 227150_at   | 112.8  | 4.9  |
| 4782  | Nuclear factor I C                                                     | NFIC             | 110 | 28 | 226895_at   | 195.6  | 11.3 |
| 4784  | Nuclear factor I X                                                     | NFIX             | 1   | 0  | 227400_at   | 101    | 8.1  |
| 4800  | Nuclear transcription factor Y                                         | NFYA             | 53  | 0  | 204108_at   | 44.4   | 1.8  |
| 4801  |                                                                        | NFYB             |     |    | 218127_at   | 104.1  | 6.1  |
| 4802  |                                                                        | NFYC             |     |    | 202215_s_at | 101    | 4.6  |
| 10062 | Nuclear receptor subfamily 1 group H member 3                          | NR1H3            | 26  | 2  | 217370_x_at | 174.6  | 17.2 |
| 7025  | Nuclear receptor subfamily 2 group F member 1                          | NR2F1 / COUP-TF1 | 2   | 1  | 209505_at   | 128.6  | 10.2 |
| 2908  | Nuclear receptor subfamily 3 group C member 1                          | NR3C1            | 297 | 46 | 201865_x_at | 164.7  | 8.6  |
| 5080  | Paired box 6                                                           | PAX6             | 1   | 0  | 205646_s_at | 1430.4 | 87.3 |
| 5451  | POU class 2 homeobox 1                                                 | POU2F1           | 3   | 0  | 227254_at   | 192.6  | 7.2  |
| 5465  | Peroxisome proliferator activated receptor alpha                       | PPARA            | 6   | 0  | 223437_at   | 232    | 19.6 |
| 5914  | Retinoic acid receptor alpha                                           | RARA             | 3   | 1  | 216300_x_at | 40     | 1.9  |
| 5915  | Retinoic acid receptor beta                                            | RARB             | 11  | 4  | 205080_at   | 64.4   | 3    |
| 3516  | Recombination signal binding protein for immunoglobulin kappa J region | RBPJ             | 4   | 1  | 211974_x_at | 435.6  | 29.7 |
| 5970  | RELA proto-oncogene. NF-kB subunit                                     | RELA             | 16  | 2  | 201783_s_at | 53.3   | 3.7  |
| 6256  | Retinoid X receptor alpha                                              | RXRA             | 41  | 6  | 202449_s_at | 146    | 6.8  |
| 6670  | Sp3 transcription factor                                               | SP3              | 3   | 1  | 213168_at   | 155.7  | 7.5  |
| 6722  | Serum response factor                                                  | SRF              | 3   | 1  | 202401_s_at | 58.6   | 4.1  |
| 6772  | Signal transducer and activator of transcription 1                     | STAT1            | 15  | 1  | 200887_s_at | 160    | 13.7 |
| 6908  | TATA-box binding protein                                               | TBP              | 110 | 17 | 203135_at   | 76.7   | 2.7  |

|      |                                                    |        |    |   |             |       |      |
|------|----------------------------------------------------|--------|----|---|-------------|-------|------|
| 6925 | Transcription factor 4                             | TCF4   | 2  | 0 | 212386_at   | 526   | 30.8 |
| 6934 | Transcription factor 7 like 2                      | TCF7L2 | 8  | 1 | 212761_at   | 140.6 | 8.4  |
| 8463 | TEA domain transcription factor 2                  | TEAD2  | 1  | 0 | 243766_s_at | 53.4  | 2.4  |
| 7020 | Transcription factor AP-2 alpha                    | TFAP2A | 61 | 7 | 204653_at   | 264.8 | 29.5 |
| 7024 | Transcription factor CP2                           | TFCP2  | 5  | 0 | 209338_at   | 100.1 | 3.6  |
| 7030 | Transcription factor binding to<br>IGHM enhancer 3 | TFE3   | 65 | 3 | 212457_at   | 226.9 | 7    |
| 7068 | Thyroid hormone receptor beta                      | THRB   | 5  | 0 | 229657_at   | 106.4 | 5.3  |
| 7528 | YY1 transcription factor                           | YY1    | 67 | 5 | 201901_s_at | 379   | 22.4 |

bp: base pairs.
